# Supplementary material for: A precursor strategy for the synthesis of low band-gap polymers: an efficient route to a series of near-infrared electrochromic polymers
Source: Royal Society of Chemistry journal article supplement (doi:10.1039/c1jm10629e), 2011-01-01
Supplement: c1jm10629e.pdf [file c1jm10629e.pdf]

## Supporting Information for:

# A Precursor Strategy for the Synthesis of Low Band-Gap Polymers: An Efficient Route to a Series of Near-Infrared Electrochromic Polymers

Gang Qian,<sup>a</sup> Hana Abu<sup>a</sup> and Zhi Yuan Wang<sup>a,b</sup>

<sup>a</sup> Department of Chemistry, Carleton University, 1125 Colonel By Drive, Ottawa, Ontario, Canada K1S 5B6

<sup>b</sup> State Key Laboratory of Polymer Physics and Chemistry, Changchun Institute of Applied Chemistry, Chinese Academy of Sciences, Changchun, 130022, China

E-mail: wayne\_wang@carleton.ca

- Figure S1. TGA traces of polymers **P1-P5**.
- Figure S2. Normalized absorption (top) and fluorescence emission (bottom) spectra of polymers **P1-P5** in film.
- Figure S3. Photos of polymers **P1-P5** in solid state (top) and in chlorobenzene (bottom).
- Figure S4. Photography of green polymer **P3** on cloth with a leaf.
- Figure S5. Cyclic voltammograms of films of polymers **P1** and **P3-P5** on ITO glass plate in CH<sub>3</sub>CN containing 0.1 M Et<sub>4</sub>NClO<sub>4</sub>.
- Figure S6. The neutral, radical cation and dication states during the redox process of polymer **P3**.
- Figure S7. Absorption spectra of **P3** film on ITO glass plate in its neutral, cation and dication states.
- Figure S8. <sup>1</sup>H NMR spectrum of monomer **2**.

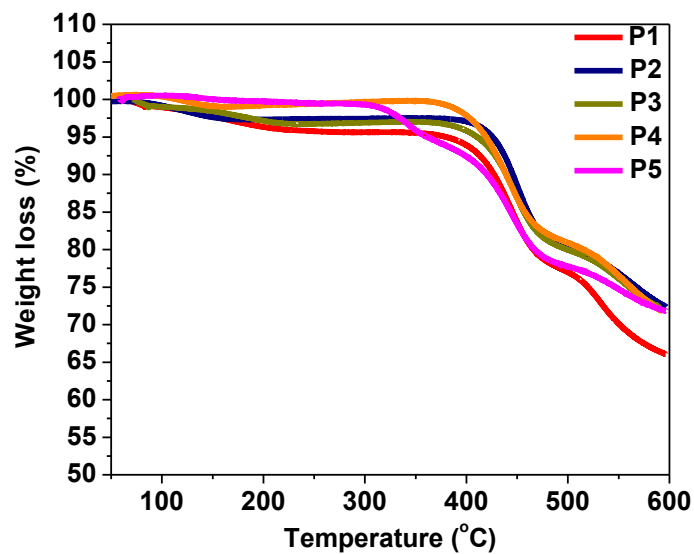

Figure S1. TGA curves of **P1-P5**.

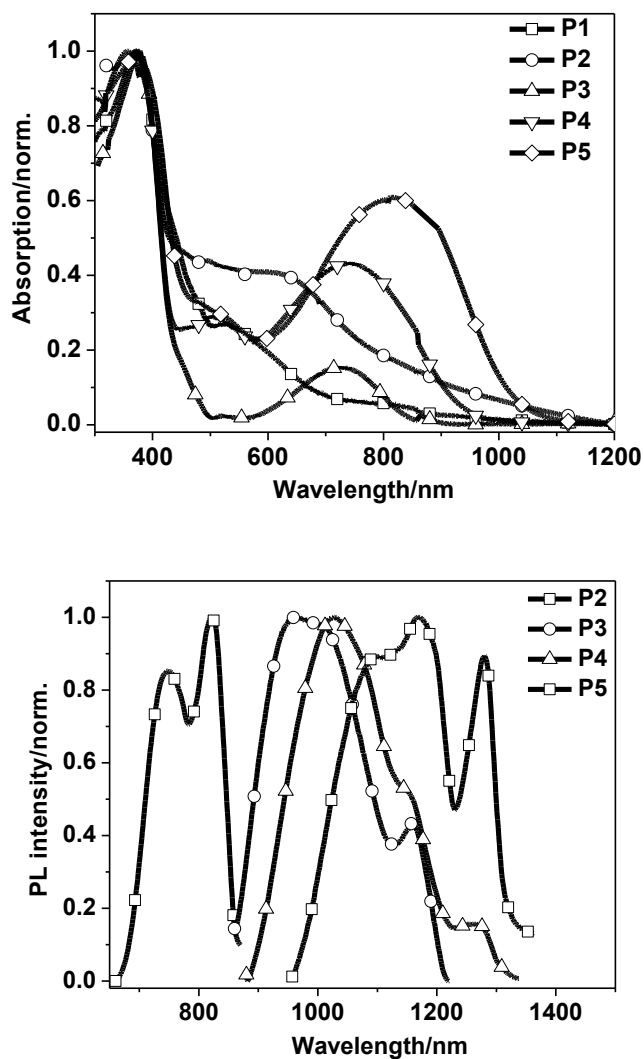

Figure S2. Normalized absorption (top) and fluorescence emission (bottom) spectra of polymers **P1-P5** in film.

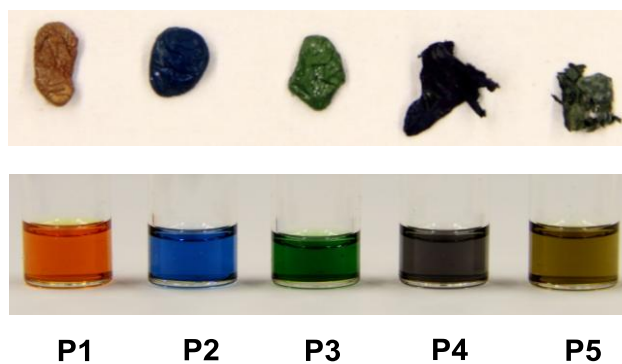

Figure S3. Photos of polymers **P1-P5** in solid state (top) and in chlorobenzene (bottom).

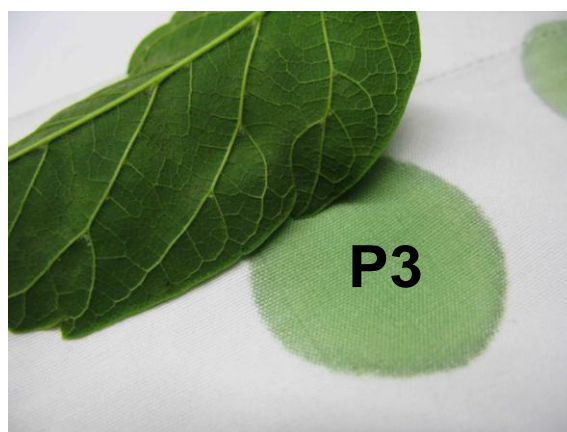

Figure S4. Photography of green polymer **P3** on cloth with a leaf.

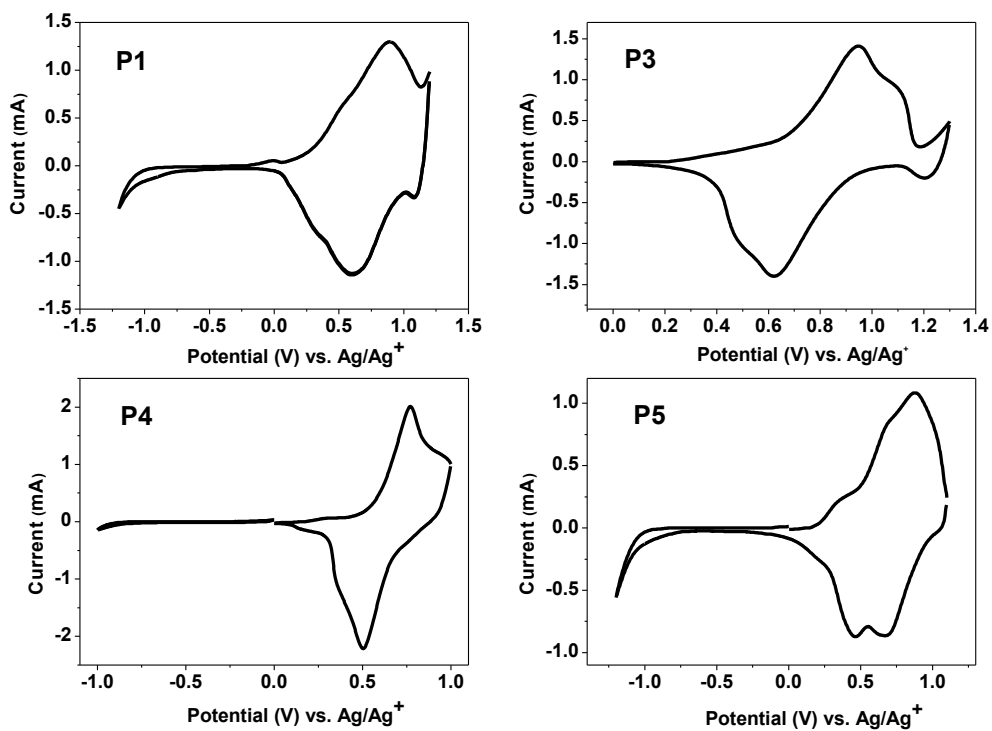

Figure S5. Cyclic voltammograms of films of polymers **P1** and **P3-P5** on ITO glass plate in CH<sub>3</sub>CN containing 0.1 M Et<sub>4</sub>NClO<sub>4</sub>.

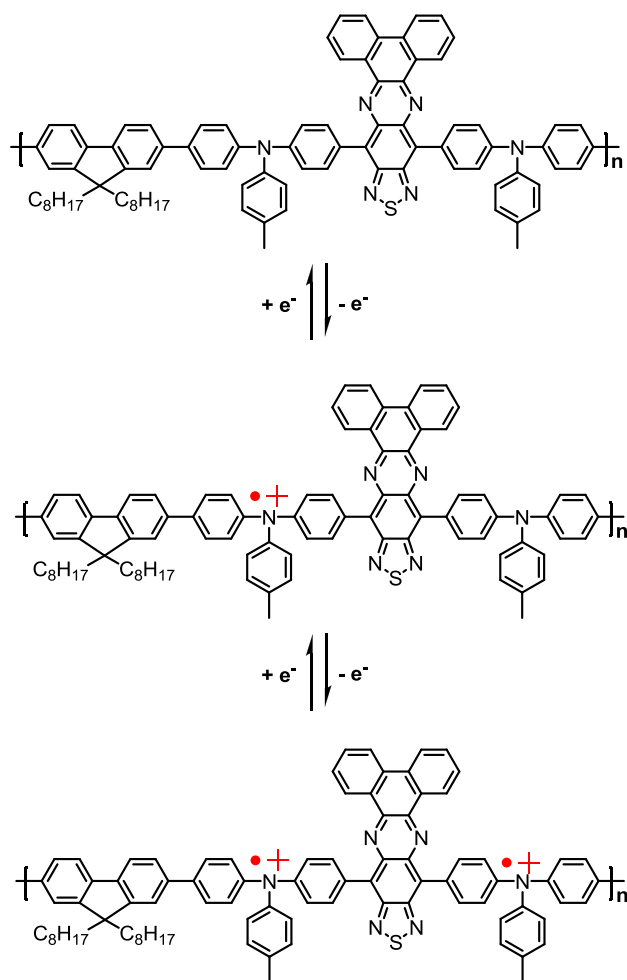

Figure S6. The neutral, radical cation and dication states during the redox process of polymer **P3**.

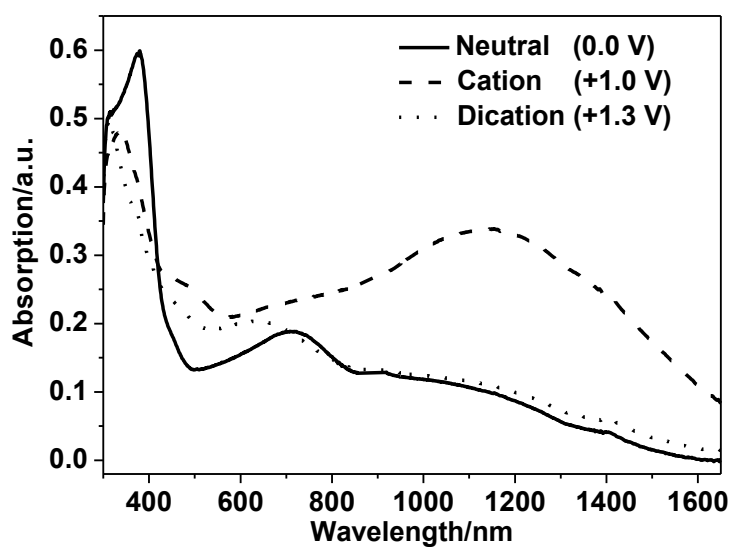

Figure S7. Absorption spectra of **P3** film on ITO glass plate in its neutral, cation and dication states.

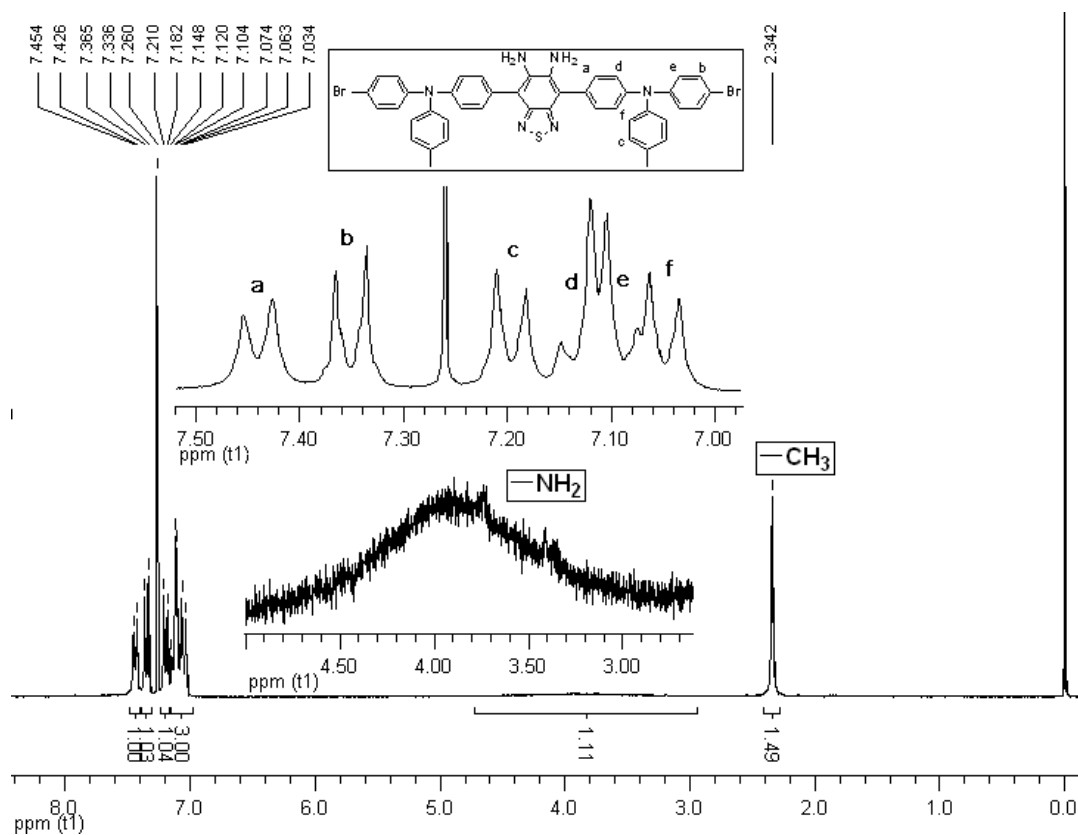

Figure S8. <sup>1</sup>H NMR spectrum of monomer **2**.
